# Supplementary material for: A Comparison of Three Measures to Identify Postnatal Anxiety: Analysis of the 2020 National Maternity Survey in England
Source: MDPI journal article supplement (doi:10.3390/ijerph19116578), 2022-05-28
Supplement: s1 [file s1]

**Table S1:** Response categories on the EPDS-3A and GAD-2

|                                               | <b>0</b>       | <b>1</b>       | <b>2</b>                | <b>3</b>              |
|-----------------------------------------------|----------------|----------------|-------------------------|-----------------------|
| <b>EPDS</b>                                   |                |                |                         |                       |
| 3. I blame myself unnecessarily               | No, never      | Not very often | Yes, some of the time   | Yes, most of the time |
| 4. Feel anxious or worried for no good reason | No, not at all | Hardly ever    | Yes, sometimes          | Yes, very often       |
| 5. Feel scared or panicky for no good reason  | No, not at all | No, not much   | Yes, sometimes          | Yes, quite a lot      |
| <b>GAD-2</b>                                  |                |                |                         |                       |
| 1. Nervous, anxious, on edge                  | Not at all     | Several days   | More than half the days | Nearly every day      |
| 2. Cant' stop or control worrying             | Not at all     | Several days   | More than half the days | Nearly every day      |
